# Supplementary material for: CSPG4 Expression in GIST Is Associated with Better Prognosis and Strong Cytotoxic Immune Response
Source: MDPI journal article supplement (doi:10.3390/cancers14051306), 2022-03-03
Supplement: s1 [file s1]

# Supplementary Materials: CSPG4 expression in GIST is associated with better prognosis and strong cytotoxic immune response

Alexandre de Nonneville, Pascal Finetti, Maelle Picard, Audrey Monneur, Maria Abbondanza Pantaleo, Annalisa Astolfi, Jerzy Ostrowski, Daniel Birnbaum, Emilie Mamessier and François Bertucci

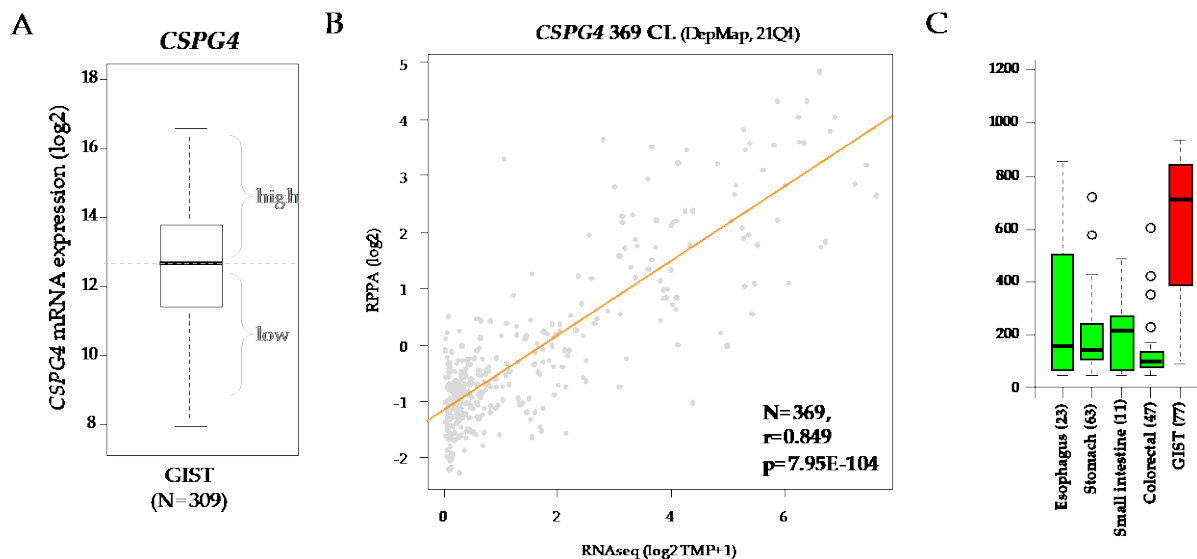

**Figure S1.** CSPG4 expression in GIST samples and cancer cell lines. (A) Box plot of mRNA expression levels in the 309 GIST clinical samples. (B) Pearson correlation between *CSPG4* mRNA (RNAseq data) and protein (RPPA) expression in 369 cancer cell lines. C/ *CSPG4* mRNA expression in GIST samples and digestive tract normal tissues according to IST Online (access date: October 20, 2020).

**Table S1. List of GIST data sets included**

| Reference                                      | Source of data                                                                                                                                                            | Technological platform  | N° of probe sets/genes | All samples | GIST samples included in the present analysis with CSPG4 |
|------------------------------------------------|---------------------------------------------------------------------------------------------------------------------------------------------------------------------------|-------------------------|------------------------|-------------|----------------------------------------------------------|
| Nielsen et al.,<br>J Clin Oncol<br>2002        | GEO : GSE3443                                                                                                                                                             | Stanford spotted DNA    | 24K                    | 46          | 9                                                        |
| Subramanian et al.,<br>Oncogene 2004           | GEO : GSE4001                                                                                                                                                             | Stanford spotted DNA    | 41K                    | 26          | 26                                                       |
| Baird et al.,<br>Cancer Res<br>2005            | GEO : GSE2553                                                                                                                                                             | NHGRI cDNA Custom Array | 12K                    | 181         | 5                                                        |
| Detwiller et al.,<br>Cancer Res<br>2005        | GEO : GSE2719                                                                                                                                                             | Affymetrix              | 22K                    | 54          | 2                                                        |
| Kang et al.,<br>Oncogene 2005                  | <a href="http://www.molpathol.org/data/GIST-array-data.txt">http://www.molpathol.org/data/GIST-array-data.txt</a>                                                         | Compugene               | 18K                    | 22          | 22                                                       |
| West et al.,<br>PLoS Biology<br>2005           | <a href="http://microarray-pubs.stanford.edu/">http://microarray-pubs.stanford.edu/</a>                                                                                   | Stanford spotted DNA    | 42K                    | 57          | 5                                                        |
| Yamaguchi et al.,<br>J Clin Oncol<br>2008      | GEO : GSE8167                                                                                                                                                             | Affymetrix              | 54K                    | 32          | 32                                                       |
| Ostrowski et al.,<br>BMC Cancer<br>2009        | GEO : GSE17743                                                                                                                                                            | Affymetrix              | 54K                    | 29          | 29                                                       |
| Rink et al.,<br>Mol Cancer Ther<br>2009        | GEO : GSE15966                                                                                                                                                            | Agilent                 | 44K                    | 54          | 29                                                       |
| Astolfi et al.,<br>Lab Invest 2010             | GEO : GSE20710                                                                                                                                                            | Affymetrix              | 54K                    | 22          | 22                                                       |
| Hadju et al.,<br>J Pathol 2010                 | <a href="http://cbio.mskcc.org/public/SFT/">http://cbio.mskcc.org/public/SFT/</a>                                                                                         | Affymetrix              | 54K                    | 56          | 3                                                        |
| Yang et al.,<br>Technol Cancer Res Treat. 2010 | <a href="http://www3.mdanderson.org/~genomics/sarcoma_data_matrix_for_supplemental.zip">http://www3.mdanderson.org/~genomics/sarcoma_data_matrix_for_supplemental.zip</a> | Agilent                 | 44K                    | 68          | 37                                                       |
| Lagarde et al.,<br>Clin Cancer Res<br>2011     | ArrayExpress : E-MTAB-373                                                                                                                                                 | Agilent                 | 44K                    | 60          | 60                                                       |
| Arne et al.,<br>Int J Cancer<br>2011           | GEO : GSE14755                                                                                                                                                            | Swegene                 | 55K                    | 21          | 13                                                       |
| Lee et al.,<br>PLoS One 2013                   | GEO : GSE47911                                                                                                                                                            | Agilent                 | 44K                    | 16          | 15                                                       |

**Table S2. Clinicopathological characteristics of patients and tumors included in the prognostic analysis.**

| Characteristics                    | N          | All               | <i>CSPG4 group</i> |             | p-value               |
|------------------------------------|------------|-------------------|--------------------|-------------|-----------------------|
|                                    |            |                   | low                | high        |                       |
| <b>Age median (range), years</b>   | <b>101</b> | <b>62 (26-85)</b> | <b>59 (26-82)</b>  | 62 (40-85)  | 0.215                 |
| Sex                                | 161        |                   |                    |             | 0.170                 |
| female                             |            | 64 (40%)          | 20 (32%)           | 44 (44%)    |                       |
| male                               |            | 97 (60%)          | 42 (68%)           | 55 (56%)    |                       |
| Mutation                           | 160        |                   |                    |             | 2.56×10 <sup>-2</sup> |
| wild-type                          |            | 19 (12%)          | 10 (16%)           | 9 (9%)      |                       |
| <i>KIT</i>                         |            | 116 (72%)         | 48 (77%)           | 68 (69%)    |                       |
| <i>PDGFRA</i>                      |            | 25 (16%)          | 4 (6%)             | 21 (21%)    |                       |
| Site                               | 161        |                   |                    |             | 1.49×10 <sup>-6</sup> |
| gastric                            |            | 131 (81%)         | 38 (61%)           | 93 (94%)    |                       |
| small intestine                    |            | 21 (13%)          | 17 (27%)           | 4 (4%)      |                       |
| other                              |            | 9 (6%)            | 7 (11%)            | 2 (2%)      |                       |
| AFIP risk                          | 160        |                   |                    |             | 4.82×10 <sup>-4</sup> |
| low                                |            | 85 (53%)          | 21 (34%)           | 64 (65%)    |                       |
| intermediate                       |            | 31 (19%)          | 16 (26%)           | 15 (15%)    |                       |
| high                               |            | 44 (28%)          | 25 (40%)           | 19 (19%)    |                       |
| Extension stage                    | 161        |                   |                    |             | NA                    |
| advanced                           |            | 0 (0%)            | 0 (0%)             | 0 (0%)      |                       |
| localized                          |            | 161 (100%)        | 62 (100%)          | 99 (100%)   |                       |
| Follow-up median, months (min-max) | 87         | 46 (2-165)        | 44 (5-101)         | 45 (2-165)  | 0.904                 |
| DFS event, N (%)                   | 161        | 32 (20%)          | 24 (39%)           | 8 (8%)      | 3.79×10 <sup>-6</sup> |
| 5-year DFS                         | 87         | 79% [69-90]       | 59% [38-90]        | 90% [81-99] | 1.15×10 <sup>-2</sup> |
